# Supplementary material for: PD-L1 expression as a predictor of postoperative recurrence and the association between the PD-L1 expression and EGFR mutations in NSCLC
Source: PubMed Central journal article supplement (PMC8410871; doi:10.1038/s41598-021-96938-9), 2021-09-01
Supplement: 41598_2021_96938_MOESM1_ESM.pdf [file 41598_2021_96938_MOESM1_ESM.pdf]

**Title.**

PD-L1 expression as a predictor of postoperative recurrence and the association between the PD-L1 expression and *EGFR* mutations in NSCLC

**Authors' names:**

Kensuke Kojima, Tetsuki Sakamoto, Takahiko Kasai, Tomoko Kagawa, Hyungeun Yoon & Shinji Atagi

Supplementary Table S1. Association between the *EGFR* mutation status and patient clinicopathological variables

| Variables                          | <i>EGFR</i> mutation status |                        |                  |                  |                                            | <i>P</i> |
|------------------------------------|-----------------------------|------------------------|------------------|------------------|--------------------------------------------|----------|
|                                    | Total<br>(N = 280)          | Wild-type<br>(N = 181) | Ex21<br>(N = 48) | Ex19<br>(N = 31) | Minor<br>mutation <sup>a</sup><br>(N = 20) |          |
| Age: ≥70 years — no. (%)           | 156 (55.7)                  | 97 (53.6)              | 33 (68.8)        | 17 (54.8)        | 9 (45.0)                                   | 0.21     |
| Sex: Male — no. (%)                | 157 (56.1)                  | 123 (68.0)             | 16 (33.3)        | 12 (38.7)        | 6 (30.0)                                   | < 0.001  |
| Current or former smoker — no. (%) | 174 (62.1)                  | 135 (74.6)             | 19 (39.6)        | 13 (41.9)        | 7 (35.0)                                   | < 0.001  |
| Histological Type — no. (%)        |                             |                        |                  |                  |                                            | <0.001   |
| ADC                                | 216 (77.1)                  | 120 (66.3)             | 48 (100)         | 30 (96.8)        | 18 (90.0)                                  |          |
| SCC                                | 46 (16.4)                   | 46 (25.4)              | 0 (0)            | 0 (0)            | 0 (0)                                      |          |
| Other <sup>b</sup>                 | 18 (6.4)                    | 15 (8.3)               | 0 (0)            | 1 (3.2)          | 2 (10.0)                                   |          |
| Pathological Stage — no. (%)       |                             |                        |                  |                  |                                            | 0.02     |
| I                                  | 202 (72.1)                  | 128 (70.7)             | 40 (83.3)        | 20 (64.5)        | 14 (70.0)                                  |          |
| II                                 | 50 (17.9)                   | 37 (20.4)              | 3 (6.2)          | 9 (29.0)         | 1 (5.0)                                    |          |
| IIIA                               | 28 (10.0)                   | 16 (8.8)               | 5 (10.4)         | 2 (6.5)          | 5 (25.0)                                   |          |
| Surgical procedure — no. (%)       |                             |                        |                  |                  |                                            | 0.74     |

|                                   |            |            |           |           |           |        |
|-----------------------------------|------------|------------|-----------|-----------|-----------|--------|
| Lobectomy                         | 262 (93.6) | 167 (92.4) | 46 (95.8) | 31 (100)  | 18 (90.0) |        |
| Bilobectomy                       | 6 (2.1)    | 6 (3.3)    | 0 (0)     | 0 (0)     | 0 (0)     |        |
| Lobectomy with combined resection | 12 (4.3)   | 8 (1.3)    | 2 (4.2)   | 0 (0)     | 2 (10.0)  |        |
| Lymph node dissection — no. (%)   |            |            |           |           |           | 0.97   |
| ND1                               | 25 (8.9)   | 15 (8.3)   | 5 (10.4)  | 3 (9.7)   | 2 (10.0)  |        |
| ND2                               | 255 (91.1) | 166 (91.7) | 43 (89.6) | 28 (90.3) | 18 (90.0) |        |
| Adjuvant therapy — no. (%)        |            |            |           |           |           | 0.72   |
| Platinum-based chemotherapy       | 28 (10.0)  | 19 (10.5)  | 3 (6.2)   | 3 (9.7)   | 3 (15.0)  |        |
| PD-L1 expression — no. (%)        |            |            |           |           |           | <0.001 |
| <1%                               | 78 (27.9)  | 38 (21.0)  | 19 (39.6) | 15 (48.4) | 6 (30.0)  |        |
| 1-49%                             | 146 (52.1) | 92 (50.8)  | 28 (58.3) | 14 (45.2) | 12 (60.0) |        |
| ≥50%                              | 56 (20.0)  | 51 (28.2)  | 1 (2.1)   | 2 (6.5)   | 2 (10.0)  |        |

<sup>a</sup> Defined as all mutations except Ex21 and Ex19.

<sup>b</sup> Defined as histological types of NSCLC with the exclusion of ADC and SCC. The 18 cases included 2 patients with large cell carcinoma, 3 patients with adenosquamous carcinoma, 7 patients with large cell neuroendocrine carcinoma and 6 patients with pleomorphic carcinoma.

*EGFR* epidermal growth factor receptor gene, *Ex21* exon 21 L858R mutation, *Ex19* exon19 deletion mutation, *ADC*

adenocarcinoma, *SCC* squamous cell carcinoma, *PD-L1* programmed cell death-ligand 1.
