# Supplementary material for: PD-L1 expression as a predictor of postoperative recurrence and the association between the PD-L1 expression and EGFR mutations in NSCLC
Source: PubMed Central journal article supplement (PMC8410871; doi:10.1038/s41598-021-96938-9), 2021-09-01
Supplement: 41598_2021_96938_MOESM2_ESM.pdf [file 41598_2021_96938_MOESM2_ESM.pdf]

**Title.**

PD-L1 expression as a predictor of postoperative recurrence and the association between the PD-L1 expression and *EGFR* mutations in NSCLC

**Authors' names:**

Kensuke Kojima, Tetsuki Sakamoto, Takahiko Kasai, Tomoko Kagawa, Hyungeun Yoon & Shinji Atagi

Supplementary Table S2. Association between postoperative recurrence and patient clinicopathological variables.

| <b>variables</b>                   | <b>Total<br/>(N = 280)</b> | <b>No recurrence<br/>(N =241)</b> | <b>Recurrence<br/>(N = 39)</b> | <b>P</b> |
|------------------------------------|----------------------------|-----------------------------------|--------------------------------|----------|
| Age: ≥70 years — no. (%)           | 156 (55.7)                 | 135 (56.0)                        | 21 (53.8)                      | 0.86     |
| Sex: Male — no. (%)                | 157 (56.1)                 | 127 (52.7)                        | 30 (76.9)                      | 0.005    |
| Current or former smoker — no. (%) | 174 (62.1)                 | 143 (59.3)                        | 31 (79.5)                      | 0.02     |
| Histological Type — no. (%)        |                            |                                   |                                | 0.006    |
| ADC                                | 216 (77.1)                 | 192 (79.7)                        | 24 (61.5)                      |          |
| SCC                                | 46 (16.4)                  | 38 (15.8)                         | 8 (20.5)                       |          |
| Other <sup>a</sup>                 | 18 (6.4)                   | 11 (4.6)                          | 7 (17.9)                       |          |
| Pathological Stage — no. (%)       |                            |                                   |                                | <0.001   |
| I                                  | 202 (72.1)                 | 189 (78.4)                        | 13 (33.3)                      |          |
| II                                 | 50 (17.8)                  | 40 (16.6)                         | 10 (25.6)                      |          |
| IIIA                               | 28 (10.0)                  | 12 (5.0)                          | 16 (41.0)                      |          |
| Surgical procedure — no. (%)       |                            |                                   |                                | 0.011    |

---

|                                   |            |            |           |        |
|-----------------------------------|------------|------------|-----------|--------|
| Lobectomy                         | 262 (93.6) | 229 (95.0) | 33 (84.6) |        |
| Bilobectomy                       | 6 (2.1)    | 5 (2.1)    | 1 (2.6)   |        |
| Lobectomy with combined resection | 12 (4.3)   | 7 (2.9)    | 5 (12.8)  |        |
| Lymph node dissection — no. (%)   |            |            |           | 0.22   |
| ND1                               | 25 (8.9)   | 24 (10.0)  | 1 (2.6)   |        |
| ND2                               | 255 (91.1) | 217 (90.0) | 38 (97.4) |        |
| Adjuvant therapy — no. (%)        |            |            |           | <0.001 |
| Platinum-based chemotherapy       | 28 (10.0)  | 15 (6.2)   | 13 (33.3) |        |
| <i>EGFR</i> mutation — no. (%)    |            |            |           | 0.051  |
| Wild-type                         | 181 (64.6) | 149 (61.8) | 32 (82.1) |        |
| Ex21                              | 48 (17.1)  | 45 (18.7)  | 3 (7.7)   |        |
| Ex19                              | 31 (11.1)  | 30 (12.4)  | 1 (2.6)   |        |
| Minor mutation <sup>b</sup>       | 20 (7.1)   | 17 (7.1)   | 3 (7.7)   |        |
| PD-L1 expression                  |            |            |           | <0.001 |
| <1%                               | 78 (27.8)  | 74 (30.7)  | 4 (10.3)  |        |
| 1-49%                             | 146 (52.1) | 131 (54.4) | 15 (38.5) |        |

---

---

|             |           |           |           |
|-------------|-----------|-----------|-----------|
| $\geq 50\%$ | 56 (20.0) | 36 (14.9) | 20 (51.3) |
|-------------|-----------|-----------|-----------|

---

<sup>a</sup> Defined as histological types of NSCLC with the exclusion of ADC and SCC. The 18 cases included 2 patients with large cell carcinoma, 3 patients with adenosquamous carcinoma, 7 patients with large cell neuroendocrine carcinoma and 6 patients with pleomorphic carcinoma.

<sup>b</sup> Defined as all mutations except Ex21 and Ex19.

*PD-L1* programmed cell death-ligand 1, *ADC* adenocarcinoma, *SCC* squamous cell carcinoma, *EGFR* epidermal growth factor receptor gene, *Ex21* exon 21 L858R mutation, *Ex19* exon19 deletion mutation.
